# Supplementary material for: Investigation of the nucleation and growth dynamics of FePt nanoparticles prepared via a high-temperature synthesis route employing PtCl2 as platinum precursor
Source: Royal Society of Chemistry journal article supplement (doi:10.1039/b822306h), 2009-01-01
Supplement: b822306h.pdf [file b822306h.pdf]

## SUPPORTING INFORMATION

for

### Investigation of the nucleation and growth dynamics of FePt nanoparticles prepared via a high temperature synthesis route employing $\text{PtCl}_2$ as platinum precursor

Hauke Heller,<sup>a</sup> Kirsten Ahrenstorf,<sup>a</sup> Jose A. C. Broekaert<sup>b</sup> and Horst Weller\*<sup>a</sup>

<sup>a</sup> University of Hamburg, Institute of Physical Chemistry, Hamburg, Germany. E-mail: [weller@chemie.uni-hamburg.com](mailto:weller@chemie.uni-hamburg.com)

<sup>b</sup> University of Hamburg, Institute of Inorganic and Applied Chemistry, Hamburg, Germany. E-mail: [jose.broekaert@chemie.uni-hamburg.de](mailto:jose.broekaert@chemie.uni-hamburg.de)

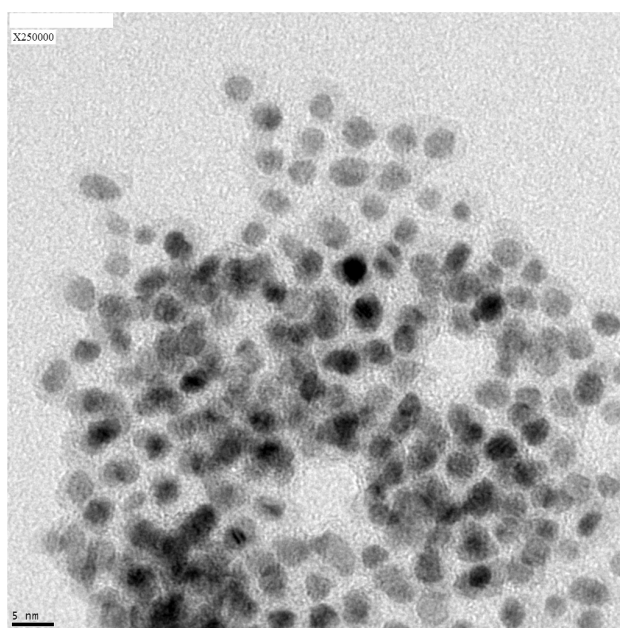

**Fig. S1**  $\text{Fe}_{49}\text{Pt}_{51}$  particles (as determined by EDX) obtained with a molar ratio of 3:1 of  $\text{Fe}(\text{acac})_3$  over  $\text{Pt}(\text{acac})_2$ . A lighter hull can be seen around the particles that we attribute to iron oxide, as the position of the (111) reflex of FePt ( $40.1^\circ$ ) correlates to  $\sim \text{Fe}_{13}\text{Pt}_{87}$  and does not fit the high iron content.
